# Supplementary material for: Awareness of HCV Status and Preferences for Testing and Treatment among People with Recent Injecting Drug Use at a Peer-Led Needle and Syringe Program: The TEMPO Pilot Study
Source: MDPI journal article supplement (doi:10.3390/v14112463), 2022-11-07
Supplement: s1 [file s1]

**Table S1.** Acceptability and preferences for aspects of HCV testing and treatment ( $n = 101$ ).

| Variable                                                                                                                             | Overall    |
|--------------------------------------------------------------------------------------------------------------------------------------|------------|
| <b>Total</b>                                                                                                                         | <b>101</b> |
| <b>Would you prefer to get your HCV results on the same day?, <math>n = 101</math> (%)</b>                                           |            |
| Yes                                                                                                                                  | 96 (95%)   |
| No                                                                                                                                   | 0 (0%)     |
| Doesn't matter                                                                                                                       | 5 (5%)     |
| <b>What is the main reason you want your result on the same day?, <math>n = 96</math> (% of those who want same day results)</b>     |            |
| I want them as soon as possible                                                                                                      | 17 (18%)   |
| Less worry/stress                                                                                                                    | 52 (54%)   |
| More convenient                                                                                                                      | 25 (26%)   |
| Other                                                                                                                                | 2 (2%)     |
| <b>Preferred time to receive HCV test results, <math>n = 101</math> (%)</b>                                                          |            |
| Within 20 minutes                                                                                                                    | 84 (83%)   |
| Within 30 minutes                                                                                                                    | 1 (1%)     |
| Within one hour                                                                                                                      | 7 (7%)     |
| Within two hours                                                                                                                     | 2 (2%)     |
| After 2 hours, but on the same day                                                                                                   | 0 (0%)     |
| After today, but within one week                                                                                                     | 1 (1%)     |
| Does not matter                                                                                                                      | 6 (6%)     |
| <b>For results within an hour, preferred method of result provision, multiple responses possible, <math>n = 101</math> (%)</b>       |            |
| Text message                                                                                                                         | 36 (36%)   |
| By phone                                                                                                                             | 28 (28%)   |
| In person                                                                                                                            | 70 (69%)   |
| From my GP                                                                                                                           | 9 (9%)     |
| From my OAT clinic                                                                                                                   | 5 (5%)     |
| <b>For results within an hour, preferred person to provide the result, multiple responses possible, <math>n = 101</math> (%)</b>     |            |
| Nurse                                                                                                                                | 82 (81%)   |
| Peer needle and syringe program worker                                                                                               | 88 (87%)   |
| Other needle and syringe program worker                                                                                              | 33 (33%)   |
| Peer support worker                                                                                                                  | 20 (20%)   |
| Doctor                                                                                                                               | 21 (21%)   |
| Other                                                                                                                                | 4 (4%)     |
| <b>Acceptability of fingerstick blood testing, <math>n = 101</math> (%)</b>                                                          |            |
| Very acceptable                                                                                                                      | 93 (92%)   |
| Somewhat acceptable                                                                                                                  | 7 (7%)     |
| Neither acceptable nor unacceptable                                                                                                  | 0 (0%)     |
| Somewhat unacceptable                                                                                                                | 1 (1%)     |
| Not at all acceptable                                                                                                                | 0 (0%)     |
| <b>Reason for finding fingerstick blood testing unacceptable, <math>n = 1</math> (% of those who found fingerstick unacceptable)</b> |            |
| It takes too much time                                                                                                               | 0 (0%)     |
| I feel the results will not be accurate                                                                                              | 0 (0%)     |
| It is painful                                                                                                                        | 1 (100%)   |
| <b>Acceptability of venepuncture blood testing, <math>n = 101</math> (%)</b>                                                         |            |
| Very acceptable                                                                                                                      | 41 (41%)   |
| Somewhat acceptable                                                                                                                  | 25 (25%)   |
| Neither acceptable nor unacceptable                                                                                                  | 6 (6%)     |

|                                                                                                                           |          |
|---------------------------------------------------------------------------------------------------------------------------|----------|
| Somewhat unacceptable                                                                                                     | 22 (22%) |
| Not at all acceptable                                                                                                     | 7 (7%)   |
| <b>Reason for finding venepuncture blood testing unacceptable, n = 29 (% of those who found fingerstick unacceptable)</b> |          |
| It takes too much time                                                                                                    | 3 (10%)  |
| I feel the results will not be accurate                                                                                   | 2 (7%)   |
| I have poor veins and it is difficult for the nurse or doctor to get blood from me                                        | 15 (52%) |
| It is painful                                                                                                             | 7 (24%)  |
| Other                                                                                                                     | 2 (7%)   |
| <b>Preferred testing method, n = 101 (%)</b>                                                                              |          |
| Venepuncture                                                                                                              | 10 (10%) |
| Fingerstick test                                                                                                          | 91 (90%) |
| <b>Reason for preferring venepuncture, n = 10 (% of those that prefer venepuncture)</b>                                   |          |
| It is quick                                                                                                               | 3 (30%)  |
| I know it will be accurate                                                                                                | 2 (20%)  |
| I am used to having testing done this way                                                                                 | 0 (0%)   |
| It does not hurt                                                                                                          | 1 (10%)  |
| Other                                                                                                                     | 4 (40%)  |
| <b>Reason for preferring fingerstick testing, n = 91 (% of those that prefer fingerstick)</b>                             |          |
| It is quick                                                                                                               | 32 (35%) |
| I know it will be accurate                                                                                                | 0 (0%)   |
| It does not hurt                                                                                                          | 5 (5%)   |
| The nurse usually has trouble taking my blood                                                                             | 40 (44%) |
| Other                                                                                                                     | 14 (15%) |
| <b>Needle and syringe program attendance, n = 101 (%)</b>                                                                 |          |
| Not in the last month                                                                                                     | 8 (8%)   |
| Less than weekly                                                                                                          | 42 (42%) |
| Weekly                                                                                                                    | 28 (28%) |
| A few times a week                                                                                                        | 16 (16%) |
| Daily                                                                                                                     | 7 (7%)   |
| <b>Willingness for testing at a needle and syringe program, n = 101 (%)</b>                                               |          |
| Definitely willing                                                                                                        | 97 (96%) |
| Somewhat willing                                                                                                          | 4 (4%)   |
| Neither willing nor unwilling                                                                                             | 0 (0%)   |
| Somewhat unwilling                                                                                                        | 0 (0%)   |
| Not at all willing                                                                                                        | 0 (0%)   |
| <b>Willingness for HCV treatment at a needle and syringe program, n = 101 (%)</b>                                         |          |
| Definitely willing                                                                                                        | 96 (95%) |
| Somewhat willing                                                                                                          | 5 (5%)   |
| Neither willing nor unwilling                                                                                             | 0 (0%)   |
| Somewhat unwilling                                                                                                        | 0 (0%)   |
| Not at all willing                                                                                                        | 0 (0%)   |
| <b>Willingness for 12 week HCV treatment, n = 101 (%)</b>                                                                 |          |
| Definitely willing                                                                                                        | 96 (95%) |
| Somewhat willing                                                                                                          | 5 (5%)   |
| Neither willing nor unwilling                                                                                             | 0 (0%)   |
| Somewhat unwilling                                                                                                        | 0 (0%)   |
| Not at all willing                                                                                                        | 0 (0%)   |
| <b>Willingness for 8 week HCV treatment, n = 101 (%)</b>                                                                  |          |
| Definitely willing                                                                                                        | 96 (95%) |
| Somewhat willing                                                                                                          | 5 (5%)   |
| Neither willing nor unwilling                                                                                             | 0 (0%)   |
| Somewhat unwilling                                                                                                        | 0 (0%)   |

|                                                                                                                                              |          |
|----------------------------------------------------------------------------------------------------------------------------------------------|----------|
| Not at all willing                                                                                                                           | 0 (0%)   |
| <b>Who would you be willing to discuss your health with at a needle and syringe program? Multiple responses possible, <i>n</i> = 101 (%)</b> |          |
| Peer needle and syringe program worker                                                                                                       | 79 (78%) |
| Other needle and syringe program workers                                                                                                     | 36 (36%) |
| Nurses                                                                                                                                       | 88 (87%) |
| Doctors                                                                                                                                      | 34 (34%) |

---
